# Supplementary material for: Fifteen-minute consultation: Management of the infant born to a mother with toxoplasmosis in pregnancy
Source: HighWire-hosted journal article supplement (doi:10.1136/archdischild-2018-316603), 2020-02-18
Supplement: edpract-2018-316603supp001_data_supplement.pdf [file edpract-2018-316603supp001_data_supplement.pdf]

## SUPPLEMENTARY MATERIALS

**Table 1: Cases of congenital toxoplasmosis in England and Wales in 2017 (E. Guy, personal communication)**

| Diagnosis of congenital toxoplasmosis | Pathology                     | Number of cases |
|---------------------------------------|-------------------------------|-----------------|
| <i>Confirmed</i>                      | Fetal death                   | 3               |
|                                       | CNS disease                   | 4               |
|                                       | Ocular disease                | 1               |
|                                       | Generalised systemic symptoms | 2               |
|                                       | <i>Total</i>                  | 10              |
| <i>Unconfirmed*</i>                   | Fetal death                   | 8               |
|                                       | Polyhydramnios                | 4               |
|                                       | Fetal abnormality             | 5               |
|                                       | <i>Total</i>                  | 17              |

\* Unconfirmed cases are those cases where maternal infection is acquired (or strongly suspected) after conception, but no follow-up testing of the fetus or neonate is possible or has yet been undertaken. This further underlines the difficulty in achieving accurate estimates of incidence.
